# Supplementary material for: Partial Conservation between Mice and Humans in Olfactory Bulb Interneuron Transcription Factor Codes
Source: PubMed Central journal article supplement (PMC4951497; doi:10.3389/fnins.2016.00337), 2016-07-20
Supplement: Image1.pdf [file Image1.pdf]

*Supplementary Material*

**Partial Conservation Between Mice and Humans in Olfactory Bulb of Interneuron Transcription Factor Codes**

Nana Fujiwara, John W. Cave\*

\* **Correspondence:** John W. Cave: [joc2042@med.cornell.edu](mailto:joc2042@med.cornell.edu)

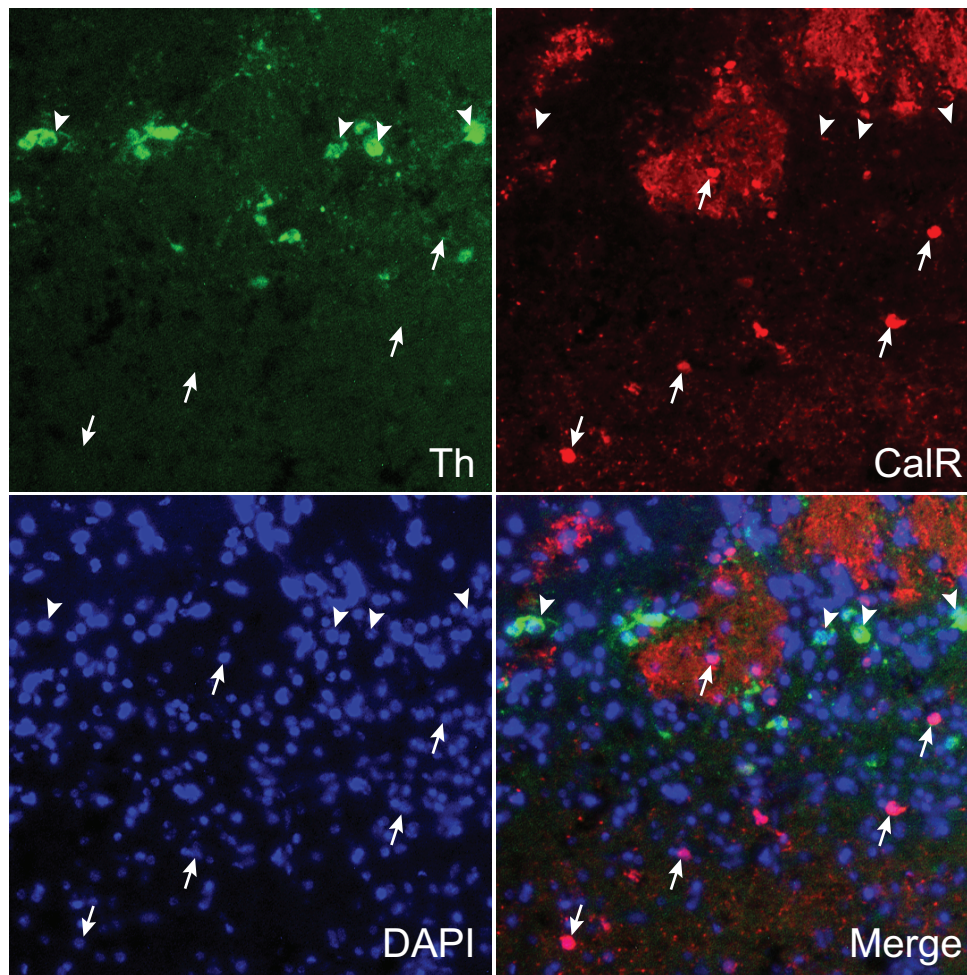

**1 Supplementary Figure**

**Supplementary Figure S1.** Th and Calretinin expression in the adult human olfactory bulb is mutually exclusive. Arrowheads indicate the position of Th-expressing cells, and arrows mark the position of cells containing Calretinin.
